# Supplementary material
Source: Springer Nature journal article supplement (https://www.springermedizin.de/resource/supplementary/13256_2007_439_MOESM2_ESM.pdf/9645990)
Supplement: MOESM2 [file 9645990]

Anterior mediastinal nodes

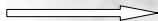

Right para-aortic nodes

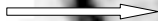

Abnormal focal uptake in pelvis  
(?vagina or rectum)

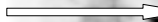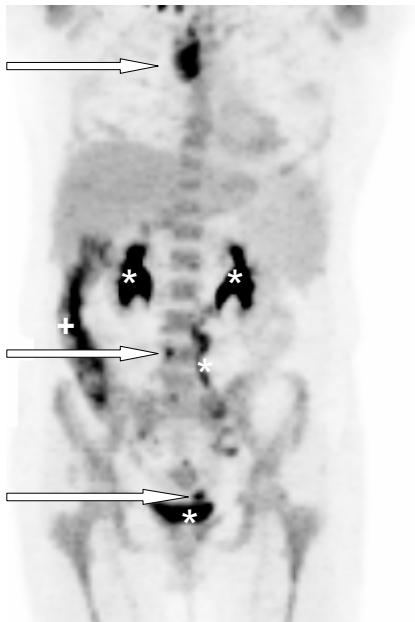

Normal renal tract excretion (\*)  
Normal colonic mucosal uptake(+)
